# Supplementary material for: The Stress Response Factors Yap6, Cin5, Phd1, and Skn7 Direct Targeting of the Conserved Co-Repressor Tup1-Ssn6 in S. cerevisiae
Source: PLoS One. 2011 Apr 28;6(4):e19060. doi: 10.1371/journal.pone.0019060 (PMC3084262; doi:10.1371/journal.pone.0019060)
Supplement: Dataset S1 — Tup1 bound sites with data shown in Figure 1 . (XLSX) [file pone.0019060.s005.xlsx]

## Sheet: Tup1_bound_locations FDR<0.001
Array Element Name	TUP1_YPD_p-value_chipotle	Tup1 ChIP YPD (Z-score)	SSN6 ChIP YPD (Z-score)	Mock (Z-score)		ChIP-Aft1/Rcs1 (p<0.001 Harbison et al 2004)	ChIP-Crt1/Rfx1 (p<0.001 Harbison et al 2004)	ChIP-Mig1 (p<0.001 Harbison et al 2004)	ChIP-Nrg1 (p<0.001 Harbison et al 2004)	ChIP-Rox1 (p<0.001 Harbison et al 2004)	ChIP-Sko1 (p<0.001 Harbison et al 2004)	ChIP-Sut1 (p<0.001 Harbison et al 2004)	ChIP-MCM1 (p<0.001 Harbison et al 2004)	ChIP-Cup9 (p<0.001 Harbison et al 2004)		Tup1 ChIP in aft1delta	Tup1 ChIP in crt1delta	Tup1 ChIP in mig1delta	Tup1 ChIP in nrg1delta	Tup1 ChIP in rox1delta	Tup1 ChIP in sko1delta	Tup1 ChIP in sut1delta
IYIR020C	1.32093e-171	7.3456	5.98776	0.133819		0	0	0	1	1	0	1	0	1		6.9976	3.60216	6.46277	7.0707	5.57039	7.27524	6.98943
IYIL119C-0	1.63201e-107	9.45183	5.85551	1.00802		0	0	0	1	1	0	1	0	1		7.7461	5.17624	3.2031	5.94988	6.51459	7.94252	7.30142
IYJR157W-1	3.2029e-105	8.08848	5.16201	0.641109		0	0	0	1	1	0	1	0	1		6.55236	8.28487	7.81828	8.7848	6.95744	8.19584	7.69945
IYKL045W	2.86004e-70	7.04062	3.32359	-0.503074		0	0	0	1	0	0	0	0	0		6.00143	6.53153	4.46695	5.99521	4.96583	5.52857	6.55327
IYMR016C-1	6.12259e-68	6.58943	2.37247	0.88229		0	0	0	1	1	1	0	0	0		6.12683	6.26029	5.67573	7.83181	4.72311	5.91385	6.43503
IYPR013C-0	3.41294e-53	4.56424	2.15783	-0.447248		0	0	0	1	1	1	0	0	0		3.46789	6.17812	5.02899	6.41959	6.18988	2.53932	4.59232
IYJR158W-1	4.18067e-53	6.91325	4.56125	-0.425392		0	0	1	1	1	0	0	0	1		4.78026	5.65825	5.48735	5.34113	4.76656	5.28433	6.01877
IYOR178C-1	1.98651e-51	6.86898	2.81196	0.781911		0	0	1	1	1	0	1	0	1		5.07988	4.04081	4.98979	5.31289	5.69076	7.54758	5.9413
IYOL156W-1	2.60718e-51	5.43486	2.37047	-1.45136		0	0	0	1	0	0	0	0	1		3.65686	4.84596	2.83004	3.36676	2.54037	4.17029	4.42171
IYGR248W	2.3452e-49	6.04994	3.55507	0.354448		0	0	0	1	0	0	1	0	0		4.24117	4.34023	3.77988	6.16507	5.16146	5.27841	5.46437
IYBL030C-1	3.27035e-49	8.11333	4.21197	-0.285819		0	0	0	1	1	1	1	0	1		5.3848	6.58995	7.32329	8.85326	5.39399	5.83153	6.78235
IYDL037C-1	3.33232e-49	5.12219	4.02004	-1.46084		0	0	0	0	0	0	1	0	0		5.63744	4.89378	2.08126	4.64176	5.06333	4.77407	6.30525
IYJL220W	4.27406e-48	6.76274	2.65553	1.52135		0	0	1	1	1	0	0	0	0		3.52113	7.73798	5.45829	5.95617	5.12132	4.07728	4.72052
IYGR249W-0	4.87766e-47	5.55264	4.54829	0.172445		0	0	0	1	0	0	0	0	0		4.37485	3.46872	2.89226	3.8826	4.56907	4.69462	4.81503
IYDR259C	1.09324e-42	5.68011	3.76575	-0.308981		0	0	0	1	1	0	0	0	1		5.00943	4.00909	3.20456	5.80636	4.35005	5.13742	4.26746
IYEL071W-1	1.7215e-41	5.01374	5.29554	0.630276		0	0	1	1	1	0	NA	0	1		4.40378	5.67108	3.16763	3.71025	4.4596	4.14158	4.8585
IYOL157C	1.65925e-40	6.3983	2.79083	1.14137		0	0	1	1	1	0	0	0	0		4.25069	1.95822	4.3119	3.65486	5.10458	4.52833	6.25361
IYDR441C	2.5437e-39	5.11992	2.9733	0.661279		0	0	1	1	1	0	1	0	1		4.75928	5.21709	4.9011	6.53131	4.11622	4.67443	4.5129
IYKL110C-1	7.97529e-39	5.37346	3.53017	-0.344457		0	0	0	0	0	0	1	0	0		4.74989	6.77325	4.23007	7.12209	4.06257	4.1437	4.48412
IYDR076W	5.26087e-38	6.03835	4.18732	-0.491858		0	0	0	0	1	1	1	0	1		5.30215	4.90452	5.0852	4.45038	4.9211	3.89871	5.46353
IYEL041W	7.70346e-38	5.39752	2.4382	0.489187		0	0	0	1	1	0	0	1	1		4.54058	4.21128	2.38188	4.96437	3.27972	4.40129	4.91263
IYJL106W-1	1.34141e-36	4.88288	2.3131	-1.43448		0	0	0	0	0	0	1	0	0		3.49629	3.36266	2.65164	3.89967	3.45913	3.33827	3.87223
IYDR343C	5.9922e-34	5.31497	2.97406	-0.0854574		0	0	0	0	0	0	1	0	0		3.08465	3.86738	3.5653	2.49528	4.17411	3.02111	4.1907
IYHR032W	1.10776e-30	5.55166	2.39267	1.14714		0	0	0	1	0	1	0	0	0		4.94637	4.19258	3.17565	2.92967	3.79991	3.32222	4.68753
IYLR412W-0	4.82472e-30	3.97056	1.52177	-1.4413		0	0	0	0	1	0	0	0	0		2.60364	4.26484	2.78298	3.26502	1.30777	2.79836	2.38183
IYDR134C	1.70162e-29	4.64036	2.77365	-0.798557		0	0	0	1	0	0	1	0	0		3.2235	2.8631	1.62688	2.98072	2.95313	3.63284	3.47668
IYIL013C	8.92287e-28	4.00426	2.49885	-0.185308		0	0	0	0	0	0	1	0	0		3.89664	4.72036	4.66398	5.21587	1.84024	2.32382	4.37483
IYNL146W	3.30229e-27	3.66942	3.24498	-0.44538		0	0	0	0	0	0	0	1	0		3.34697	4.11113	2.20036	4.34377	2.43608	3.91597	4.26082
IYER045C-0	1.16965e-26	4.2298	2.14164	-0.300418		0	0	0	1	0	0	1	0	0		1.4347	4.71741	2.5238	3.302	2.81802	2.64132	3.75993
IYEL069C-0	6.53712e-26	4.4029	4.52401	0.610027		0	0	1	1	0	0	1	0	0		2.42069	6.42838	2.48674	2.95605	4.13363	4.53591	3.27814
IYAL063C-0	3.98106e-24	4.70338	3.11083	0.246194		0	NA	0	NA	NA	0	1	0	0		3.85368	1.99785	3.6253	3.82729	3.89841	3.31362	4.14304
IYLR286C	5.78226e-24	5.3661	3.81703	1.76817		0	1	0	0	0	0	0	0	0		3.32154	0.286991	2.19605	3.7826	4.08549	2.61863	3.25665
IYAL064C-A-5	2.71167e-22	4.19181	2.71814	-0.230802		0	0	0	1	0	0	1	0	0		3.24893	2.26482	2.09778	3.43213	2.7247	2.4163	3.67887
IYNL179C-1	1.66701e-21	4.54534	1.74242	-0.364076		0	0	0	0	0	0	1	0	0		3.39206	1.8465	0.781317	3.81297	2.78352	1.04806	3.5933
IYOR314W	3.75899e-20	4.62387	2.55347	-0.0805358		0	0	0	1	1	0	0	1	0		3.11554	5.19066	3.59474	3.66987	3.35538	3.59872	3.83719
IYKL063C-1	1.18884e-19	4.47696	1.09703	-1.21608		0	0	0	0	0	0	1	0	0		3.43594	2.19113	3.08854	3.67291	2.46029	5.08871	3.91746
IYJR094C-0	2.3262e-19	4.62324	2.32245	-0.43483		0	0	0	1	0	0	0	0	0		4.31397	2.9134	2.02738	2.38808	3.48166	2.99819	5.21238
IYDR535C	6.14356e-19	3.19551	3.11396	-0.00622639		0	0	0	1	0	1	NA	0	0		2.13681	4.16254	1.21151	2.97075	4.0936	1.93513	2.96367
IYARCDELTA8-0	8.00785e-19	3.53756	1.68527	-0.490639		0	0	NA	1	0	NA	0	0	0		1.91561	2.35892	1.87445	3.04902	1.86508	1.83321	2.75677
IYKL162C-A-1	9.26206e-19	3.79893	2.60826	-1.02783		0	0	0	1	0	1	0	0	0		2.39327	4.48264	2.80197	2.86192	1.99017	1.50325	3.11727
ITL(CAA)G1	4.53668e-18	2.76661	1.59354	0.189553		0	0	0	0	0	0	1	0	0		3.38258	1.9639	1.68722	2.19467	3.02772	2.51339	2.63795
IYIR013C	6.0549e-18	3.80293	3.39394	-0.553311		0	0	0	1	0	0	0	0	0		3.94454	6.0387	3.04741	1.5497	3.57048	1.95155	2.96189
IYKL097W-A-1	8.53894e-17	3.64016	1.49264	-1.21002		0	0	0	0	0	1	1	0	0		1.59841	2.66904	1.57215	0.482745	1.70374	-0.0846381	4.65059
IYMR069W	1.13892e-16	2.6485	2.68821	0.00787934		0	0	0	0	0	1	1	0	0		3.82957	4.12938	1.67546	2.62744	2.67606	1.85965	2.95718
IYFL055W-0	6.86683e-16	3.81735	1.59297	0.22947		0	0	1	1	0	0	1	0	0		3.48103	2.11773	0.788006	3.10325	3.15218	4.05744	3.82749
IYKR101W-2	1.62466e-15	3.81692	2.61924	1.38384		0	0	0	1	0	0	0	0	0		4.28264	4.6879	3.63397	4.73638	2.82199	3.7525	3.87781
IYPL231W	7.65843e-14	3.35857	0.40976	0.24313		0	0	0	1	1	0	1	0	0		2.68591	1.68717	1.03995	1.86828	2.1718	1.70392	2.7574
IYMR319C-0	1.28018e-13	3.71984	0.987224	0.134715		1	0	0	1	1	0	0	0	0		2.99131	2.65295	3.83939	2.15937	1.46973	2.06175	3.30179
IYDL185W	4.95472e-13	2.53915	0.815915	0.10425		0	0	0	0	1	0	0	0	0		1.96277	1.547	0.521461	1.11912	0.230953	1.00196	1.80397
IYLR303W	8.43262e-13	3.38245	0.501207	-0.581644		0	0	0	0	0	0	0	1	0		3.3513	NA	NA	NA	1.52849	-1.75495	NA
IYDR043C-0	1.60888e-12	2.02994	1.79803	-0.274039		NA	0	0	1	0	0	0	0	0		1.83092	2.36809	1.49265	2.70848	0.787986	1.03073	1.4432
IYDL130W	9.27887e-12	1.50927	0.210458	0.300028		0	1	0	0	0	0	0	0	0		1.40253	1.74941	1.74481	2.14204	0.891942	1.55454	2.43455
IYMR010W-1	1.32258e-11	2.83306	2.25358	-1.34856		0	0	0	0	0	0	1	0	0		2.71243	1.00071	0.579671	1.26306	1.23272	2.51377	2.19212
IYOR316C-1	2.66139e-10	3.12422	1.48018	-0.786959		0	0	0	0	0	1	0	0	0		3.1413	1.71831	0.864828	1.60993	1.81063	1.17222	1.7076
IYAL039C-1	3.52375e-10	2.48295	1.7525	-0.0475814		0	NA	0	NA	NA	0	0	1	0		1.04576	1.30331	1.66756	1.73462	1.21826	2.2885	1.08112
IYJL104W	1.71637e-09	2.21346	1.69654	-0.0939732		0	0	0	0	1	0	0	0	0		2.29795	2.0132	2.56736	2.99173	0.909239	1.47698	1.56
IYNR059W	2.56339e-09	2.88487	0.78519	-0.498626		NA	NA	0	1	0	0	0	0	0		0.35867	2.11257	4.31197	2.8404	0.716455	0.0761534	1.41091
IYGR180C	5.27668e-09	3.1919	0.686717	0.447922		0	1	0	0	0	0	0	0	0		1.60533	0.953851	0.973138	1.42009	0.934432	2.02029	1.7703
IYHR048W	6.74725e-09	2.12961	0.785253	0.168434		0	0	0	0	0	1	0	0	0		0.919366	2.15363	1.75682	2.04143	1.83848	2.26536	2.46804
ICEN5	7.9148e-09	2.97533	1.07153	-0.237125		0	0	0	1	0	0	0	0	0		2.30462	3.25852	2.63268	3.33862	2.02484	1.93107	2.71664
IYER010C-1	2.24546e-08	2.85917	2.59653	-0.607802		0	0	0	1	0	0	0	0	0		3.58882	2.94338	1.1739	2.46777	2.22625	2.06038	3.80365
IYPL177C-0	2.48762e-08	2.60773	2.05792	-1.36898		0	0	0	0	0	0	1	0	0		2.76649	3.23842	1.54656	2.74385	2.5751	2.83388	4.46268
IYKR075C-0	3.63877e-07	2.22708	1.02093	-0.894216		0	0	0	0	0	0	1	0	0		0.282981	0.765179	0.0492856	1.92622	1.11844	1.04474	1.00163
IYDL214C	3.96597e-07	2.99099	2.51568	-0.214734		0	0	0	0	0	0	1	0	0		3.50921	2.66279	1.67921	3.51579	2.6503	-0.364114	2.10686
IYLR304C	4.38099e-07	2.65576	1.56099	-1.06039		0	0	0	0	0	0	1	0	0		1.25539	2.34396	2.18656	2.51675	1.21815	2.62674	1.99434
IYGR067C	4.39005e-06	2.31206	NA	1.22793		0	0	0	0	0	0	1	0	0		2.46887	2.59112	1.56273	2.31004	2.75308	1.07869	1.6669
IYKR096W	4.98974e-06	2.74368	0.987632	0.202222		0	0	0	0	0	0	1	0	0		1.95996	0.434416	0.928575	1.50481	2.80204	1.97458	1.22323
IYER145C	8.43832e-06	2.2822	0.953449	-0.601033		0	0	0	0	0	0	1	0	0		1.71256	2.77974	2.90541	1.91457	1.85994	1.39233	3.27325
IYKR041W	6.68966e-42	5.63298	3.15867	-0.0675922		0	0	0	0	0	0	0	0	0		5.39148	3.22374	4.96119	5.09299	3.44222	4.48062	4.78979
IYEL008W	1.25636e-37	4.01283	1.90702	-0.190971		0	0	0	0	0	0	0	0	0		3.26284	1.9893	1.33024	2.65691	1.45376	2.96833	2.61841
IYPR014C-0	1.81272e-37	2.43275	1.98572	-0.465569		0	0	0	0	0	0	0	0	0		1.46047	1.50604	2.02943	1.04297	1.68834	1.70951	NA
IYGL097W-0	2.42753e-37	5.55051	1.26646	-0.711655		NA	0	0	0	0	NA	0	0	0		3.26714	5.4149	3.13888	4.26198	3.09752	2.95384	4.15552
IYOR027W	2.45666e-34	6.28338	2.36842	-0.930879		0	0	0	0	0	0	0	0	0		5.27597	8.47077	4.43311	5.87205	5.14587	3.52156	7.11242
IYNR071C	4.82451e-34	6.3078	3.37455	0.159926		0	0	0	0	0	0	NA	0	0		5.86286	9.76717	8.39414	9.25027	6.5506	5.86849	8.05842
IYOR344C-0	3.00412e-33	5.07574	0.987343	-0.00207264		0	0	0	0	0	0	0	0	0		2.77617	NA	1.30088	2.62985	1.32887	0.775839	1.29655
IYAR047C-1	1.96128e-28	4.83329	1.82985	0.353442		NA	NA	NA	NA	NA	NA	0	0	0		3.81881	4.32193	5.05079	4.99008	3.49148	4.30979	4.92678
IYJL219W	4.65757e-26	3.35119	3.07863	0.15102		NA	0	0	0	0	0	0	0	0		2.28139	2.04556	2.15928	2.52056	3.22926	2.75244	2.80962
IYPR079W	2.24972e-24	3.82851	0.124892	0.394997		0	0	0	0	0	0	0	0	0		0.399956	2.18971	1.7173	1.94905	1.06208	0.400976	1.00243
IYGR050C	9.09013e-24	3.8529	1.90366	-1.3887		0	0	0	0	0	0	0	0	0		4.81035	3.93836	3.08947	4.15269	2.98466	2.98843	3.825
IYDR416W	3.64444e-22	3.01346	0.749884	1.88823		0	0	0	0	0	0	0	0	0		-0.00764761	0.0554867	0.470633	0.502358	-0.421712	0.0936409	0.452191
IYER158C	6.21931e-22	3.92786	2.55457	0.447551		0	0	0	0	0	0	0	0	0		3.81	2.68277	3.04572	4.68479	3.65789	3.73398	3.62137
IYIRCDELTA6-0	1.94729e-21	4.60865	2.81511	0.9191		0	0	0	0	0	NA	0	0	0		5.30219	3.52134	3.35989	4.08772	5.14167	3.36658	5.04028
IYMR142C	2.16162e-20	3.45776	0.591374	1.90217		0	0	0	0	0	0	0	0	0		0.728332	0.0252681	1.20359	1.1696	0.815397	0.263422	0.872709
ITS(UGA)I	1.20311e-19	3.27978	2.42285	0.588359		0	0	0	0	0	0	NA	0	0		3.90303	4.55454	2.45013	3.00865	2.73955	3.4583	3.21016
IYIR018W-2	5.8412e-18	4.37003	NA	-0.185404		0	0	0	0	0	0	0	0	0		3.99201	6.69847	4.93385	5.67845	3.11541	3.60416	3.90435
ISNR61	2.01939e-17	1.59389	2.85905	-0.31601		0	NA	0	0	0	NA	0	0	0		0.613922	0.779415	1.33086	0.248882	1.00284	0.265095	1.20251
IYDL083C	3.02286e-16	2.64315	0.131235	1.34948		0	0	0	0	0	0	0	0	0		-1.27319	-0.484267	-0.752963	0.111467	-0.582559	-1.71142	-0.0613314
ITM(CAU)O2	9.36088e-16	3.43891	1.49263	1.05091		0	0	0	0	0	0	0	0	0		1.05533	2.69035	1.37625	1.83672	0.800729	0.326927	1.63527
IYAR044W-1	3.37456e-15	3.55015	2.59865	-0.0373454		0	0	0	0	0	0	0	0	0		3.04506	3.53951	2.38146	4.11223	2.32539	1.79029	2.45616
IYBL028C	1.50742e-14	2.0371	1.21233	0.653495		0	NA	0	NA	NA	0	NA	0	0		0.136564	0.947264	0.823618	0.424174	1.25854	0.252233	-0.241358
IYBR157C-0	1.54429e-14	2.81001	0.530182	-1.2607		0	0	0	0	0	0	0	0	0		0.917115	0.966153	0.117429	1.64344	0.483658	1.23057	2.20731
IYNL067W	1.55561e-14	2.60816	1.4607	0.49999		0	0	0	0	0	0	0	0	0		2.09028	1.38006	0.664252	1.86149	0.901205	1.51072	1.57664
IYPL250C	3.97904e-14	1.15896	0.100795	-0.572022		0	0	0	0	0	0	0	0	0		-0.522642	-0.0335222	-0.212427	1.24425	0.53544	0.302973	-0.0738567
IYGR279C	7.63366e-14	2.93335	1.57913	0.557799		0	0	0	0	0	0	0	0	0		1.79752	2.10418	1.73807	3.95827	1.02027	1.68838	2.6791
IYJL158C	2.06246e-13	2.94085	1.85545	-1.53396		0	0	0	0	0	0	0	0	0		2.51694	1.24414	1.27629	3.17747	1.88197	2.50394	2.99947
IYLR402W	4.17945e-13	2.408	0.964236	-0.77862		0	0	0	0	0	0	0	0	0		-0.926573	0.0986466	0.0134224	-0.532049	1.41672	NA	1.58091
IYJR122W	1.34299e-12	2.83022	0.183007	-0.223578		0	0	0	0	0	0	0	0	0		0.310947	0.0603733	-0.856487	-0.084867	-1.11664	-0.343988	-0.0929576
IYBR181C	1.41627e-12	2.28492	-0.845866	0.583763		0	0	0	0	0	0	0	0	0		-0.449271	0.0346443	1.09091	0.36328	1.03323	0.0627842	0.489017
IYDL137W	3.45909e-12	2.62713	-0.0276115	0.833935		0	0	0	0	0	0	0	0	0		-0.620407	0.750376	1.47604	1.01803	0.055218	-0.0200967	0.527159
IYLR299W	3.48789e-12	3.80022	3.52126	-0.0738225		0	0	0	0	0	0	0	0	0		3.57538	2.22122	1.77809	3.60781	2.28722	2.71919	4.54465
IYBR067C	6.30368e-12	2.64795	1.01187	0.884142		0	0	0	0	0	0	0	0	0		2.75125	1.42101	0.987396	2.76683	0.580288	0.781494	1.75773
IYFL051C-0	6.78342e-12	1.93608	1.08855	0.05883		0	0	0	0	0	0	0	0	0		2.01694	0.923591	1.71528	1.8489	1.87296	3.09328	4.08772
IYPL145C	1.54341e-11	2.1057	0.523212	-0.611718		0	0	0	0	0	0	0	0	0		0.209046	1.10564	0.745091	1.1941	0.101625	1.31574	0.630401
IYFL022C	3.06455e-11	3.40072	1.4568	1.48232		0	0	0	0	0	0	0	0	0		2.74648	4.00056	1.39821	1.20678	1.87612	1.76613	2.68373
IYHL029C	3.50958e-11	3.52862	1.8017	-1.14189		0	0	0	0	0	0	0	0	0		2.54181	3.65508	0.770843	3.08352	1.83829	2.54273	2.71492
IYER033C	8.15557e-11	3.33471	3.64724	-0.6539		0	0	0	0	0	0	0	0	0		4.35027	4.17698	4.19909	4.31285	4.88603	3.71356	3.98079
IYEL060C	8.33788e-11	2.41676	0.70418	0.619122		0	0	0	0	0	0	0	0	0		1.98775	1.93998	1.84314	1.74565	1.52128	2.09756	2.50872
IYPR008W	1.17849e-10	3.03799	1.60594	0.46428		0	0	0	0	0	0	0	0	0		1.6102	1.92536	2.17762	2.88078	1.05928	1.42644	1.48455
ISNR48	2.17704e-10	2.25157	0.68352	-0.835882		0	0	0	0	0	0	0	0	0		2.68321	0.715092	-0.21202	-0.0177521	2.09494	0.935104	1.60651
IYGR035C	2.23293e-10	2.77961	0.802987	1.37049		0	0	0	0	0	0	0	0	0		0.386238	0.773058	2.14668	0.554701	-0.394902	-0.583395	-0.386362
IYDL131W	2.51818e-10	2.90408	NA	0.765994		0	0	0	0	0	0	0	0	0		-0.212692	-0.309366	-0.162518	-0.494755	1.36302	NA	NA
IYDR342C-0	2.61365e-10	3.14164	1.32203	-0.978946		0	0	0	0	0	0	0	0	0		1.74571	2.33162	1.85197	2.3673	0.447772	1.8686	1.84416
IYDR449C	2.79431e-10	2.4682	-0.290485	0.810816		0	0	0	0	0	0	0	0	0		0.6987	-0.828412	-0.299801	0.529298	-0.319937	-0.407407	-0.318154
IYDL055C-0	2.88934e-10	2.28821	0.575283	0.704229		0	0	0	0	0	0	0	0	0		0.500096	1.19379	0.943959	0.785122	0.70438	0.716532	2.47895
ITE(UUC)E2	4.91491e-10	2.5553	0.999522	0.468812		0	0	0	0	0	0	0	0	0		2.04847	0.388794	0.363993	1.13638	1.41654	2.47316	1.1515
IYBR031W	5.57676e-10	2.29721	2.52221	0.249659		0	0	0	0	0	0	0	0	0		0.895768	0.22949	0.16201	0.28572	1.32911	2.83251	3.03877
IYJL079C	6.61411e-10	2.97989	1.53339	-0.166741		0	0	0	0	0	0	0	0	0		3.24759	1.94014	3.03	3.67503	1.28859	2.61276	2.49386
IYAR028W	7.89965e-10	3.00015	0.999904	0.348259		0	NA	0	NA	NA	0	0	0	0		1.14883	0.853081	2.05679	-0.355074	0.565294	0.178996	2.93663
IYIL123W	9.77736e-10	2.57407	1.37483	-0.452857		0	0	0	0	0	0	0	0	0		1.42343	0.789568	1.1652	2.02376	1.36573	1.45729	2.57545
IYBR201W-1	1.23374e-09	2.04233	0.654476	-0.111198		0	0	0	0	0	0	0	0	0		1.70305	0.439367	-0.248979	1.05587	2.10279	1.27094	1.65083
IYMR015C	1.89269e-09	2.63249	0.830455	0.0395068		0	0	0	0	0	0	0	0	0		2.44113	1.52832	2.02218	2.91148	1.71955	1.70997	2.34994
IYDR500C	3.8343e-09	2.28301	1.03087	0.972064		0	0	0	0	0	NA	0	0	0		0.275342	-0.0100335	0.0672044	-0.529945	0.653227	-0.927733	-0.470941
IYGR033C	3.98536e-09	2.16186	0.198891	0.937908		0	0	0	0	0	0	0	0	0		0.798473	0.84312	0.549914	-0.473691	0.261959	0.477574	-0.136414
IYDR258C	4.52947e-09	2.30829	NA	-0.116702		0	0	0	0	0	0	0	0	0		2.23602	0.330635	-0.370264	0.732454	0.259171	-0.205854	0.319105
IYBR182C	5.50627e-09	2.06168	0.788981	-0.937718		0	0	0	0	0	0	0	0	0		0.0617251	0.72771	1.22221	1.08007	0.34265	-0.415541	0.816162
IYMR316C-A	5.83615e-09	2.98707	1.59342	1.21635		0	0	0	0	0	0	0	0	0		3.21392	2.67803	2.16239	2.75115	1.08789	1.05111	2.59014
IYER055C	6.05622e-09	1.9607	0.831515	-0.322984		0	0	0	0	0	0	0	0	0		1.18943	0.601134	0.825175	1.0276	0.406549	1.24876	1.08739
IYPL190C	7.41689e-09	2.43156	1.62798	0.483621		0	0	0	0	0	0	0	0	0		1.90732	1.20634	2.30139	1.74945	1.50411	1.04654	1.5918
IYNL069C	8.1902e-09	2.61193	1.28276	1.10098		0	0	0	0	0	0	0	0	0		0.675726	1.12207	0.0231708	0.394672	-0.48115	-0.327842	0.225415
IYCL025C	1.07689e-08	2.69445	1.53111	0.335358		0	0	0	0	0	0	0	0	0		1.76339	1.46629	1.22172	1.80956	1.09464	1.26619	1.87629
IYLR461W-1	1.58108e-08	2.15338	-0.226662	1.14616		0	0	0	0	0	0	0	0	0		-0.220283	0.153964	1.01122	0.18384	0.1717	0.648539	0.98385
IYOR354C-0	1.64925e-08	1.53833	0.712473	0.523493		0	0	0	0	0	0	0	0	0		0.0890559	0.454202	0.296406	-0.281158	-0.124299	0.552507	-0.665419
IYER056C	1.6514e-08	0.930253	0.818343	-1.6405		0	0	0	0	0	0	0	0	0		0.201855	-0.453436	-0.0074881	0.334913	-0.0197711	-1.06895	-0.458513
ITM(CAU)P	2.59659e-08	1.57401	2.28176	-0.0621336		0	0	0	0	0	0	0	0	0		1.36297	2.1853	2.40762	2.93235	1.70637	0.0327621	0.219171
IYNL289W-1	3.47572e-08	2.00643	-1.52235	0.978225		0	0	0	0	0	0	0	0	0		0.908201	1.12999	1.05174	1.41202	0.139505	0.438076	0.94089
IYARWDELTA7	5.14191e-08	2.14569	1.67135	0.370169		0	0	0	0	0	0	0	0	0		3.11706	3.28568	3.32182	4.38457	1.89129	2.19609	2.25369
IYPL017C	5.36264e-08	3.03146	1.20105	1.61235		0	0	0	0	0	0	0	0	0		1.93865	1.48904	1.76788	1.8524	0.637025	1.48784	1.84547
IYIL117C	6.06784e-08	1.96035	-0.98788	0.428007		0	0	0	0	0	0	0	0	0		1.09597	1.48377	2.48219	2.73971	0.898525	0.949285	1.62816
IYHL016C	6.89153e-08	1.41658	1.72771	0.219228		0	0	0	0	0	0	0	0	0		0.473168	1.04829	1.12595	1.28602	0.620449	0.700279	1.14012
ITS(AGA)D2	8.84569e-08	2.31294	1.29938	1.10511		0	0	0	0	0	0	0	0	0		1.69484	1.05265	1.15888	1.7175	2.30281	2.01332	0.989808
IYLR264W	9.06645e-08	2.68457	1.80147	0.73676		0	0	0	0	0	0	0	0	0		0.813343	0.50613	0.473268	1.10746	0.465216	0.39401	1.05265
IYGR213C	9.3397e-08	2.10313	1.27589	0.100137		0	0	0	0	0	0	0	0	0		0.787611	1.00313	0.155789	1.16045	0.8611	1.12635	1.09372
ITV(AAC)G1	1.12675e-07	1.96177	2.34054	0.378482		0	0	0	0	0	NA	0	0	0		1.31603	2.03704	1.93371	2.48911	1.6427	1.92391	1.13035
ITT(AGU)H	1.59481e-07	1.5873	0.60283	-0.287038		0	0	0	0	0	NA	0	0	0		1.48325	0.515466	0.849117	0.78792	1.11558	0.757018	0.680049
IYLR341W	1.7197e-07	2.80839	1.63874	-0.881753		0	0	0	0	0	0	0	0	0		2.47811	2.43236	1.41721	2.29941	2.4269	1.42173	2.86832
IYDR072C	1.84187e-07	1.8656	0.933793	-1.80468		0	0	0	0	0	0	0	0	0		1.17424	2.34185	2.52808	1.97682	1.6713	0.370918	2.21639
IYIL055C	2.06846e-07	2.42642	-0.484589	0.62179		NA	NA	NA	NA	0	NA	0	0	0		1.85126	0.637004	1.15727	1.03779	0.622989	0.213407	0.689658
IYIL122W	2.12252e-07	1.99386	0.341028	-0.553812		0	0	0	0	0	0	0	0	0		1.09715	0.897564	0.875442	1.15017	-0.582007	0.0277394	0.805547
IYPL266W	2.75195e-07	1.47301	1.81137	-1.16623		0	0	0	0	0	0	0	0	0		0.732576	0.891994	0.227339	0.870246	0.379845	0.635152	0.578755
IYIR018W-0	2.98791e-07	2.51482	1.44127	0.340767		0	0	0	0	0	0	0	0	0		1.82081	1.88458	2.62963	3.10171	1.93969	1.43544	2.29629
IYEL066W	3.61151e-07	1.20654	1.17276	-0.0862727		0	0	0	0	0	0	0	0	0		0.0591575	0.107258	0.816787	1.08093	0.708424	2.19264	1.77578
IYOR246C	5.35916e-07	2.84602	1.06757	-1.05649		0	0	0	0	0	0	0	0	0		2.22507	2.01098	2.19475	3.15064	1.82224	2.19729	2.06984
IYGR242W	6.75768e-07	1.80181	1.45762	-0.520536		0	0	0	0	0	0	0	0	0		1.2102	0.975829	0.33583	2.06655	1.59147	-0.272178	1.35511
IYOL040C	6.90563e-07	1.88103	-0.277759	0.66219		0	0	0	0	0	0	0	0	0		0.180002	1.87286	0.94699	1.10604	-0.519317	0.373687	0.133251
IYKL060C	8.15135e-07	1.16462	1.06657	-1.80586		0	0	0	0	0	0	0	0	0		1.11592	-0.653935	0.627423	0.171737	-0.256878	0.297366	0.702017
IYGL210W	8.65777e-07	2.53708	1.04326	-0.309541		0	0	0	0	0	0	0	0	0		1.65978	0.39396	0.0264633	1.1691	0.868281	1.1341	1.52336
IYGLWDELTA6	1.26126e-06	2.81321	2.49589	0.904661		NA	NA	0	NA	0	NA	0	0	0		1.11366	1.9796	0.465672	1.4017	1.21114	1.08202	1.39653
IYER075C	1.53296e-06	1.92105	0.591135	0.494926		0	0	0	0	0	0	0	0	0		1.85354	1.25797	1.15956	2.26356	1.04692	1.19165	1.86959
IYLR406C	1.67986e-06	2.39611	0.753701	1.24418		0	0	0	0	0	0	0	0	0		0.169287	0.105785	0.752795	0.265851	0.58244	0.751983	0.584347
IYBR202W	1.70886e-06	1.86213	0.283611	-0.289212		0	0	0	0	0	0	0	0	0		0.577716	1.6561	1.04182	2.27067	1.46402	1.58115	1.18101
ITR(UCU)K	1.71941e-06	1.76033	0.953827	-0.389798		0	0	0	0	0	0	0	0	0		0.211127	-0.1885	-0.630489	0.0464423	-0.0116464	0.0518391	0.287488
IYKL221W-0	1.76794e-06	2.74542	1.7278	-0.966902		0	0	0	0	0	0	0	0	0		2.31276	4.24706	2.98719	3.09253	2.51736	1.74049	3.26871
IYJL225C-0	2.17507e-06	2.2705	-0.457059	-0.245295		0	0	0	0	0	0	0	0	0		-0.111318	0.511679	0.624005	1.25225	-0.274713	0.188322	0.532007
IYMR305C	2.39938e-06	2.10993	-2.74469	0.166619		0	0	0	0	0	0	0	0	0		1.86098	3.07733	1.88539	1.89317	0.980054	1.41378	2.02142
IYLR023C	3.26943e-06	2.27413	-0.423606	-0.667999		0	0	0	0	0	0	0	0	0		-0.0156835	0.70868	0.576506	0.541509	1.02759	-0.810696	1.36679
IYBR296C-0	4.31201e-06	2.36262	1.01488	-1.14851		0	NA	0	0	0	NA	0	0	0		0.852272	0.754288	0.822632	0.897771	2.19134	0.490115	0.933528
IYGR192C	4.4967e-06	2.23704	0.814924	0.232299		0	0	0	0	0	0	0	0	0		0.163023	-0.376394	0.115225	0.681352	-0.648615	0.128601	0.953517
IYKL183W	5.20068e-06	2.14567	0.000203049	0.84383		0	0	0	0	0	0	0	0	0		1.90224	0.329936	0.652855	1.05614	0.100776	0.540838	1.20132
IYOR301W	5.9985e-06	1.66159	-1.49858	-0.664069		0	0	0	0	0	0	0	0	0		-0.426694	-0.172476	-0.493041	0.60533	-1.04135	-0.431317	-0.171258
IYMR194C-A	6.06042e-06	1.40793	0.623538	-0.876245		0	0	0	0	0	0	0	0	0		1.05832	-0.0201093	0.262652	1.15083	-0.0052206	-0.169608	0.511981
IYLL052C	7.2257e-06	2.13181	1.52683	0.30744		0	0	0	0	0	0	0	0	0		0.749998	0.875351	0.373011	1.53069	0.21837	0.562436	1.55428
IYER072W	7.51391e-06	1.59284	0.369527	-0.967841		0	0	0	0	0	0	0	0	0		0.0494297	0.608129	-0.522941	1.06463	-1.88322	-0.408698	0.786541
IYOL158C	8.91197e-06	1.61984	0.776664	-0.58744		0	0	0	0	0	0	0	0	0		0.596857	0.947897	0.590312	0.322831	-0.384983	0.381389	-0.0174705
IYLR044C	9.54859e-06	2.29491	0.1444	-0.802839		0	0	0	0	0	0	0	0	0		0.211288	0.0688137	-0.816403	0.430679	0.118127	-0.562525	1.30199
IYHR203C	1.06898e-05	1.59704	0.444046	0.15457		0	0	0	0	0	0	0	0	0		0.351609	0.921222	0.0348363	0.398237	0.0568718	-0.125881	-0.447691
ITA(AGC)D	1.07152e-05	2.06515	0.343023	0.673839		0	0	0	0	0	0	0	0	0		1.1952	0.862082	1.75613	1.92614	1.13682	0.713277	0.923855
IYNL144C-0	1.36784e-05	1.60623	0.119511	-0.617048		0	0	0	0	0	0	0	0	0		0.699959	-0.350337	-0.0102515	0.176923	-0.821549	0.25648	0.328067
IYDL245C-0	5.96086e-65	7.46139	4.75842	0.724126		NA	NA	NA	NA	NA	NA	NA	NA	NA		5.37944	7.15747	6.16208	7.51878	5.89565	5.72264	6.32501
YLR111W	1.56994e-56	4.42302	2.36035	-0.533476		NA	NA	NA	NA	NA	NA	NA	NA	NA		2.44697	3.27963	2.80396	3.78898	2.29994	4.08009	4.82668
YOR029W	2.60995e-56	5.09854	2.39016	-0.00952017		NA	NA	NA	NA	NA	NA	NA	NA	NA		5.34797	5.644	4.63194	2.98273	5.52403	5.1776	5.56662
IYDL246C-0	1.1878e-48	6.15678	4.91055	0.506128		NA	NA	NA	NA	NA	NA	NA	NA	NA		5.28398	4.82777	3.76699	4.24549	5.56706	5.75638	6.03435
YOR050C	6.82467e-47	5.14684	2.1812	-1.73825		NA	NA	NA	NA	NA	NA	NA	NA	NA		4.06611	4.33847	5.48196	6.35948	3.98809	2.90192	4.50438
IYIL172C	1.50574e-39	6.3205	2.13965	1.0703		NA	NA	NA	NA	NA	NA	NA	NA	NA		4.26807	6.19196	8.97678	4.38254	4.09384	4.51225	4.67301
YMR135W-A	1.63344e-39	4.41961	2.39678	-0.136057		NA	NA	NA	NA	NA	NA	NA	NA	NA		4.17378	6.09621	5.31274	6.80879	4.50684	4.24247	5.09998
YKL097C	2.27448e-38	5.38205	2.29619	-0.741894		NA	NA	NA	NA	NA	NA	NA	NA	NA		4.11261	6.03366	4.19682	6.26369	4.76432	5.01736	5.15966
YJL027C	3.90944e-36	3.76291	0.318821	0.00268127		NA	NA	NA	NA	NA	NA	NA	NA	NA		1.56946	0.0735601	3.37081	4.36839	2.0077	1.69724	2.01033
YLR400W	6.20205e-36	4.45384	0.730189	0.830956		NA	NA	NA	NA	NA	NA	NA	NA	NA		0.011977	-0.251202	0.99075	0.00887328	0.350888	0.664906	-0.388994
YHL041W	2.00522e-35	4.90772	1.44778	-0.96197		NA	NA	NA	NA	NA	NA	NA	NA	NA		2.15536	3.91467	3.01804	3.41573	2.66919	2.44912	3.66036
YGL007W	2.10728e-34	4.60098	2.57385	-0.513596		NA	NA	NA	NA	NA	NA	NA	NA	NA		3.59402	4.02761	2.98406	5.48462	2.44934	2.91547	4.02845
YGR107W	7.4384e-34	4.46484	2.92854	-0.494834		NA	NA	NA	NA	NA	NA	NA	NA	NA		2.35401	3.7428	2.08566	3.72459	3.39506	3.92612	4.08644
YOL110W	7.98678e-30	3.25641	1.46425	0.171033		NA	NA	NA	NA	NA	NA	NA	NA	NA		0.717169	1.46317	1.21664	1.50213	-0.0617626	1.31652	1.7811
YEL035C	1.69724e-28	3.87921	1.37961	1.09178		NA	NA	NA	NA	NA	NA	NA	NA	NA		2.67445	2.04595	1.73408	3.25092	1.10585	1.84541	2.09495
YMR082C	3.3569e-28	4.90024	1.6197	-0.502848		NA	NA	NA	NA	NA	NA	NA	NA	NA		2.18052	4.20354	2.61539	4.72777	3.05992	1.59208	3.45238
YOR343C	7.0509e-27	3.74672	0.67769	1.00901		NA	NA	NA	NA	NA	NA	NA	NA	NA		2.17881	1.33948	0.170091	2.59957	1.51351	2.3827	2.11851
IYHRCDELTA14-B	1.65472e-26	3.35847	2.04446	-0.308627		NA	NA	NA	NA	NA	NA	NA	NA	NA		3.38836	2.77466	3.06711	5.01034	2.24188	2.54363	4.27758
YPR064W	2.33772e-25	5.1949	3.7958	-1.29322		NA	NA	NA	NA	NA	NA	NA	NA	NA		4.65921	5.74533	4.78576	5.41561	4.17479	3.52904	4.20058
YBL044W	3.37094e-25	5.22099	1.79193	-0.834157		NA	NA	NA	NA	NA	NA	NA	NA	NA		4.89518	6.10011	5.26069	7.07874	4.20664	4.95007	5.88822
YDR010C	8.6253e-25	4.27997	1.17871	-0.775553		NA	NA	NA	NA	NA	NA	NA	NA	NA		3.63814	4.05288	4.14563	5.21306	0.655308	2.14158	4.63139
YKL199C	6.2027e-24	4.46454	3.15619	0.216826		NA	NA	NA	NA	NA	NA	NA	NA	NA		3.83015	5.26587	3.95956	4.68621	3.03386	3.42257	4.74826
YBR190W	7.18331e-23	1.96658	1.15723	0.404236		NA	NA	NA	NA	NA	NA	NA	NA	NA		0.641164	0.0621813	1.04893	0.242397	0.160852	-1.13624	0.0610902
YCR025C	7.56119e-23	3.37638	2.2753	1.74671		NA	NA	NA	NA	NA	NA	NA	NA	NA		2.81527	2.88195	1.15938	2.73924	0.82977	1.29022	1.63707
IYIL170W-0	1.2748e-22	5.0979	2.3458	0.184269		NA	NA	NA	NA	NA	NA	NA	NA	NA		3.61824	5.04057	2.75096	3.10228	2.85534	3.85247	4.04005
YJL215C	1.67582e-21	3.57908	1.79769	1.71319		NA	NA	NA	NA	NA	NA	NA	NA	NA		2.14901	3.87828	2.28344	4.29924	2.48636	1.98638	2.88315
YPL080C	2.65325e-21	3.05145	0.49219	0.582227		NA	NA	NA	NA	NA	NA	NA	NA	NA		0.737801	-0.326754	0.796971	0.561474	0.0378029	0.0356209	-0.566166
INTYDR064W	4.56178e-21	2.99382	1.7005	1.72067		NA	NA	NA	NA	NA	NA	NA	NA	NA		1.58582	0.935938	1.8102	2.91617	0.206519	1.20263	1.48087
YEL021W	3.74128e-19	4.35157	2.60464	0.987036		NA	NA	NA	NA	NA	NA	NA	NA	NA		1.32338	1.27606	1.43579	NA	1.52239	0.294003	0.306905
YEL045C	2.60049e-18	3.65962	1.87586	1.53285		NA	NA	NA	NA	NA	NA	NA	NA	NA		1.21782	3.98567	2.12653	3.54227	2.33908	2.56323	3.86862
YHR212C	6.95142e-18	4.37131	2.36889	-1.0383		NA	NA	NA	NA	NA	NA	NA	NA	NA		3.29269	3.98342	3.11309	5.51585	3.05767	3.82192	4.41508
YGR139W	7.4402e-18	4.17234	0.624707	-0.635488		NA	NA	NA	NA	NA	NA	NA	NA	NA		3.80802	5.52295	3.81171	2.84779	2.38616	3.86215	3.40467
YLR076C	2.52045e-17	2.40728	1.2931	0.84213		NA	NA	NA	NA	NA	NA	NA	NA	NA		1.26833	1.13362	0.905247	2.53522	1.47505	1.24573	2.25579
YAL039C	4.56123e-17	3.0928	0.214181	0.579547		NA	NA	NA	NA	NA	NA	NA	NA	NA		0.718285	3.50842	1.51176	3.3119	0.114914	1.39599	1.8987
YAR060C	4.73038e-17	4.13945	2.53276	-1.2405		NA	NA	NA	NA	NA	NA	NA	NA	NA		3.55607	3.03211	2.22268	3.57291	3.29269	4.15113	4.23871
YOL085C	8.21788e-17	3.04436	1.97417	-0.693516		NA	NA	NA	NA	NA	NA	NA	NA	NA		1.85289	2.30112	2.67368	1.80833	1.60779	1.42655	2.1733
YOR348C	1.10888e-16	3.55501	2.09358	-0.606784		NA	NA	NA	NA	NA	NA	NA	NA	NA		1.11406	1.25041	4.2477	3.57768	1.73803	1.34499	2.58255
YLR236C	8.17699e-16	3.42713	2.2543	-1.24936		NA	NA	NA	NA	NA	NA	NA	NA	NA		2.91249	2.17262	3.55516	3.78593	3.35341	3.734	3.64642
SNR128	2.18996e-15	2.09397	1.47062	0.524987		NA	NA	NA	NA	NA	NA	NA	NA	NA		2.01571	1.11152	2.07486	1.96968	1.50269	1.23149	1.58614
TL(GAG)G	5.76176e-15	3.41219	3.48997	1.50052		NA	NA	NA	NA	NA	NA	NA	NA	NA		3.37104	3.83206	2.84705	4.00105	2.15455	2.25251	1.76217
YPL025C	2.35277e-14	2.72958	0.603048	-1.6028		NA	NA	NA	NA	NA	NA	NA	NA	NA		3.50114	3.09526	0.807905	3.32194	0.579412	1.16851	3.87144
YJR146W	4.77429e-14	2.73961	-0.00193404	-1.66105		NA	NA	NA	NA	NA	NA	NA	NA	NA		1.06766	1.24944	2.29384	2.46074	0.866318	1.16349	2.93766
YDR525W	1.20046e-13	3.16048	1.42961	-2.45744		NA	NA	NA	NA	NA	NA	NA	NA	NA		2.59613	3.85742	3.19246	3.01597	1.40006	2.46241	3.17772
YGR085C	2.05487e-13	2.15331	0.973719	-0.0513867		NA	NA	NA	NA	NA	NA	NA	NA	NA		0.681722	0.770036	-0.13539	1.45	0.524964	-0.203538	0.662679
TS(CGA)C	2.58869e-13	3.54276	2.45542	1.98847		NA	NA	NA	NA	NA	NA	NA	NA	NA		3.20372	3.92192	2.1918	4.1	1.65848	2.63058	2.59519
INTYGL103W	4.22529e-13	2.96113	1.36566	1.72558		NA	NA	NA	NA	NA	NA	NA	NA	NA		0.888506	1.28004	0.602373	1.30422	0.906997	1.39921	0.346436
YDR447C	9.04406e-13	2.68093	1.4777	0.933653		NA	NA	NA	NA	NA	NA	NA	NA	NA		0.893023	1.66334	0.701083	0.612494	1.04643	1.91089	1.54762
YOR369C	9.99121e-13	2.7945	1.16344	0.0906071		NA	NA	NA	NA	NA	NA	NA	NA	NA		0.448927	0.860124	1.66013	1.56588	0.565246	0.954081	0.743382
YPL062W	1.23782e-12	2.6183	0.28266	-1.88988		NA	NA	NA	NA	NA	NA	NA	NA	NA		1.60812	2.52343	3.49604	2.93771	2.62286	1.75965	2.97847
IYERWOMEGA2-1	1.29184e-12	2.72475	-0.313641	1.64005		NA	NA	NA	NA	NA	NA	NA	NA	NA		0.564107	-0.114232	0.868876	0.545193	0.550524	1.0933	1.2221
YAL069W	2.26836e-12	2.94293	0.692287	1.11813		NA	NA	NA	NA	NA	NA	NA	NA	NA		0.650789	1.27924	2.29381	2.17856	0.822779	1.23045	1.17495
YOR318C	2.55273e-12	3.28842	0.152424	-1.37811		NA	NA	NA	NA	NA	NA	NA	NA	NA		2.7442	0.66992	1.4567	2.29633	0.15304	0.14747	2.59778
YGL030W	2.7658e-12	2.67129	0.459144	1.05325		NA	NA	NA	NA	NA	NA	NA	NA	NA		1.31085	1.18906	0.516486	1.15397	0.677038	0.478826	1.83094
YJL077C	4.67333e-12	2.12531	-0.321983	-2.96584		NA	NA	NA	NA	NA	NA	NA	NA	NA		1.99357	1.01091	1.94506	2.23566	0.178964	0.22315	2.68056
YHR095W	8.1122e-12	3.99553	2.89715	-1.42179		NA	NA	NA	NA	NA	NA	NA	NA	NA		2.19573	2.5064	1.71767	4.21491	2.78523	2.18691	4.21289
YMR194W	8.36722e-12	2.04611	0.361729	0.61916		NA	NA	NA	NA	NA	NA	NA	NA	NA		0.572004	1.50145	1.46536	1.75279	0.876712	0.63153	0.760942
YML122C	8.77973e-12	1.98099	2.19551	-0.292115		NA	NA	NA	NA	NA	NA	NA	NA	NA		0.599513	2.34992	3.13003	1.88477	0.816551	1.96595	1.9626
TS(UGA)P	1.52589e-11	3.43232	2.65978	1.85872		NA	NA	NA	NA	NA	NA	NA	NA	NA		2.84728	3.49947	2.21433	3.78681	1.5131	1.56848	2.24687
YFL063W	2.25905e-11	2.35822	0.247091	0.679107		NA	NA	NA	NA	NA	NA	NA	NA	NA		0.130346	0.703019	1.02148	1.22788	0.704887	1.23124	0.912663
YLR255C	9.96775e-11	1.72891	0.415162	-1.46948		NA	NA	NA	NA	NA	NA	NA	NA	NA		0.677538	0.700446	0.220151	1.65618	-0.171856	0.987801	1.2513
YBR118W	1.05715e-10	3.09597	NA	0.78601		NA	NA	NA	NA	NA	NA	NA	NA	NA		1.43593	1.91342	0.816728	1.83435	1.49525	1.44164	1.07808
YPL056C	1.11717e-10	2.53012	0.403864	-1.41389		NA	NA	NA	NA	NA	NA	NA	NA	NA		1.63957	3.1857	2.11216	3.1928	1.17499	1.3822	2.59276
YGR027C	1.12882e-10	2.46784	0.705126	1.14686		NA	NA	NA	NA	NA	NA	NA	NA	NA		0.601553	1.20779	0.495106	0.320267	-0.319655	0.657703	0.0550789
YOR063W	1.27049e-10	2.80577	0.907954	1.62527		NA	NA	NA	NA	NA	NA	NA	NA	NA		2.01149	0.927192	0.954168	2.24821	1.32259	1.19218	2.14551
YJR128W	1.85483e-10	2.10845	0.36998	-1.66831		NA	NA	NA	NA	NA	NA	NA	NA	NA		1.39073	1.43335	1.3264	2.91547	0.47895	1.5793	2.4989
YJL007C	2.7896e-10	2.79882	1.55192	1.66738		NA	NA	NA	NA	NA	NA	NA	NA	NA		0.795329	1.91736	0.290513	1.9374	0.691196	0.801996	0.649268
LSR1	3.17754e-10	2.21957	0.471351	0.836839		NA	NA	NA	NA	NA	NA	NA	NA	NA		0.325004	1.00434	0.339618	1.42215	0.069518	2.17053	2.27807
YMR057C	3.72211e-10	2.88755	1.74661	-0.161606		NA	NA	NA	NA	NA	NA	NA	NA	NA		2.45372	3.7735	3.49268	3.85568	2.57992	2.01578	4.16538
YLR441C	4.07863e-10	2.40725	0.748882	-0.189551		NA	NA	NA	NA	NA	NA	NA	NA	NA		0.858768	1.06924	1.84825	2.39963	0.789154	0.174177	0.659839
YDR215C	5.10052e-10	2.01832	0.415808	0.233323		NA	NA	NA	NA	NA	NA	NA	NA	NA		2.77323	3.22041	2.95921	2.84688	2.61121	2.95786	3.5214
IYHR210C-A	5.67751e-10	1.87204	0.789272	-0.38624		NA	NA	NA	NA	NA	NA	NA	NA	NA		1.17305	2.09485	1.87873	3.02929	1.10083	0.905685	1.20705
YLL045C	1.3086e-09	2.31839	1.15906	1.10143		NA	NA	NA	NA	NA	NA	NA	NA	NA		1.53309	1.73923	1.01582	1.78149	1.66193	1.02423	1.55624
IYAL064C-A-0	1.78745e-09	2.58688	1.40642	-0.582469		NA	NA	NA	NA	NA	NA	NA	NA	NA		2.65007	2.53994	2.19914	2.50748	2.36064	2.95242	2.93579
YLR062C	2.68096e-09	1.93667	-0.296986	0.537955		NA	NA	NA	NA	NA	NA	NA	NA	NA		-0.055932	1.56155	-0.53304	1.51712	0.638686	0.575648	1.21933
YAR064W	3.86369e-09	2.65046	-0.65165	-0.8375		NA	NA	NA	NA	NA	NA	NA	NA	NA		0.657656	0.85838	2.31719	2.21157	-0.25605	1.25768	1.74669
YPR043W	4.06156e-09	2.31514	1.69395	1.27636		NA	NA	NA	NA	NA	NA	NA	NA	NA		-0.0124269	1.72387	0.711782	2.19916	1.41516	-0.0700868	0.394387
YLR279W	4.93996e-09	2.18347	2.07272	-1.59518		NA	NA	NA	NA	NA	NA	NA	NA	NA		2.87261	1.34037	1.97651	3.29035	0.980681	2.54193	3.22275
YDR024W	6.09694e-09	2.42071	0.257836	1.13405		NA	NA	NA	NA	NA	NA	NA	NA	NA		0.636284	-0.285448	0.410292	-0.254176	-0.407792	0.290675	-0.855336
YFR032C-A	7.13151e-09	2.26205	1.54991	0.912295		NA	NA	NA	NA	NA	NA	NA	NA	NA		0.636927	1.35431	1.11644	1.22407	0.499617	1.69857	1.10977
YLR302C	1.08607e-08	1.1534	1.24744	-0.0488193		NA	NA	NA	NA	NA	NA	NA	NA	NA		1.60036	0.379124	-0.0731336	0.641235	0.435653	1.50193	0.798233
YLR367W	1.14148e-08	1.56524	0.43446	0.356031		NA	NA	NA	NA	NA	NA	NA	NA	NA		0.617436	-0.0391214	0.115449	1.22827	-0.503468	0.555256	0.662859
YNR077C	1.18309e-08	2.37012	0.418228	0.433002		NA	NA	NA	NA	NA	NA	NA	NA	NA		0.0436671	0.868535	1.13077	1.57447	0.460314	0.533883	0.619431
YGL123W	1.94116e-08	2.28135	1.23803	0.211205		NA	NA	NA	NA	NA	NA	NA	NA	NA		1.1424	1.40567	1.20353	2.76188	1.74419	1.06612	1.49839
YHL033C	2.62147e-08	2.56004	1.26717	0.411282		NA	NA	NA	NA	NA	NA	NA	NA	NA		1.3525	0.852745	1.75818	2.22201	0.231156	0.919915	1.58631
YFL015C	2.84623e-08	2.31334	1.11762	0.709714		NA	NA	NA	NA	NA	NA	NA	NA	NA		1.5896	1.33971	2.21331	2.00742	1.23697	1.42804	1.562
YHR093W	9.43183e-08	2.73448	0.424086	-1.86327		NA	NA	NA	NA	NA	NA	NA	NA	NA		-0.214547	0.719314	3.36602	1.76941	-1.26145	-0.0827531	1.10528
YLR296W	1.19067e-07	2.22177	1.60643	-2.50896		NA	NA	NA	NA	NA	NA	NA	NA	NA		2.59865	1.43836	2.03264	2.23485	1.7849	1.45267	2.5821
SNR63	1.21236e-07	1.76561	1.82485	0.219321		NA	NA	NA	NA	NA	NA	NA	NA	NA		0.681794	0.39568	0.155038	0.219454	0.211314	0.739128	0.0825006
YML089C	2.55281e-07	2.36549	0.546801	-1.04595		NA	NA	NA	NA	NA	NA	NA	NA	NA		2.85178	0.986381	0.551525	1.93036	0.936762	1.17588	1.44806
YLR167W	2.57707e-07	2.63373	0.906085	1.37162		NA	NA	NA	NA	NA	NA	NA	NA	NA		0.766864	0.750621	1.28449	1.3914	0.267525	2.21875	2.09604
YKR094C	2.7037e-07	2.26787	1.25473	1.00577		NA	NA	NA	NA	NA	NA	NA	NA	NA		1.11437	1.12835	1.57382	0.76304	0.797968	0.327292	0.665854
YMR242C	4.61037e-07	1.6302	-0.419834	0.399576		NA	NA	NA	NA	NA	NA	NA	NA	NA		0.630656	0.88423	-0.922967	0.55366	0.915112	0.844104	0.984865
YMR326C	5.78627e-07	2.4346	0.544386	0.649319		NA	NA	NA	NA	NA	NA	NA	NA	NA		0.295686	0.706585	1.16901	1.94931	0.751482	0.90235	1.21409
YMR007W	5.89141e-07	2.36503	1.38003	-1.20158		NA	NA	NA	NA	NA	NA	NA	NA	NA		4.42733	3.47794	2.41087	3.24887	1.48467	2.73872	3.63571
YHR010W	9.38984e-07	1.50889	-0.472082	-0.615245		NA	NA	NA	NA	NA	NA	NA	NA	NA		0.011286	-0.308321	-0.15555	1.50571	-1.23371	-0.418959	-0.307083
YPR132W	1.28266e-06	1.61497	0.982803	0.290188		NA	NA	NA	NA	NA	NA	NA	NA	NA		0.134279	0.0464274	1.00611	1.18984	-0.0472236	0.683714	-0.0385051
YPL220W	1.62144e-06	1.92695	1.05521	0.434225		NA	NA	NA	NA	NA	NA	NA	NA	NA		0.383231	2.17963	0.758542	0.793455	0.282499	1.56589	0.813862
YCR102W-A	1.9862e-06	1.44974	-0.37524	0.412945		NA	NA	NA	NA	NA	NA	NA	NA	NA		-0.834289	-0.451394	-0.334017	-0.474904	-0.288511	1.11388	-0.722492
YHL001W	2.22672e-06	1.64013	0.828593	-0.17191		NA	NA	NA	NA	NA	NA	NA	NA	NA		-0.560301	0.233856	0.193842	0.307768	0.1915	0.252983	0.0696047
YBR209W	3.71024e-06	1.48803	0.655625	-0.13252		NA	NA	NA	NA	NA	NA	NA	NA	NA		1.09243	2.62232	1.97042	1.96837	3.69817	1.41798	1.71595
YDR041W	5.05619e-06	1.54994	1.22051	0.143561		NA	NA	NA	NA	NA	NA	NA	NA	NA		-0.52152	0.867567	1.08078	0.784312	-0.0528698	0.544919	0.323265
YBL072C	5.20673e-06	1.75477	-0.248153	0.255455		NA	NA	NA	NA	NA	NA	NA	NA	NA		1.28963	0.63836	1.29649	2.39173	0.360113	0.295455	0.341028
YPR015C	7.6222e-06	2.01952	0.0425038	0.773097		NA	NA	NA	NA	NA	NA	NA	NA	NA		0.653914	0.874601	1.73081	0.505556	0.58901	0.704243	1.77254
YMR122C	1.25832e-05	2.1997	0.509989	0.200487		NA	NA	NA	NA	NA	NA	NA	NA	NA		1.98285	0.335633	0.345085	3.43545	0.950193	1.16396	1.88159
YDL228C	1.52447e-05	1.79588	-0.0232015	0.0999382		NA	NA	NA	NA	NA	NA	NA	NA	NA		0.0662825	0.272207	0.509829	1.06599	0.566645	0.596383	1.05009
