# Supplementary material for: The Stress Response Factors Yap6, Cin5, Phd1, and Skn7 Direct Targeting of the Conserved Co-Repressor Tup1-Ssn6 in S. cerevisiae
Source: PLoS One. 2011 Apr 28;6(4):e19060. doi: 10.1371/journal.pone.0019060 (PMC3084262; doi:10.1371/journal.pone.0019060)
Supplement: Dataset S2 — Regulatory regions bound by each recruiter with Tup1 and Ssn6 occupancy. (XLSX) [file pone.0019060.s006.xlsx]

## Sheet: Rox1 Bound sites
Intergenic name	Tup1 binding	Mock	Ssn6
iYOR178C-1	6.86898	0.781911	2.81196
iYIR020C	7.3456	0.133819	5.98776
iYJR157W-1	8.08848	0.641109	5.16201
iYJR158W-1	6.91325	-0.425392	4.56125
iYIL100W	7.0327	2.23957	4.04525
iYDR259C	5.68011	-0.308981	3.76575
iYEL041W	5.39752	0.489187	2.4382
iYIL119C-0	9.45183	1.00802	5.85551
iYOL156W-0	5.38497	-0.0104165	2.40031
iYBL030C-1	8.11333	-0.285819	4.21197
iYDR441C	5.11992	0.661279	2.9733
iYNL289W-0	1.69271	1.64675	0.312698
iYDR076W	6.03835	-0.491858	4.18732
iYEL071W-1	5.01374	0.630276	5.29554
iYJR100C	0.453878	0.672679	-0.484257
iYMR016C-1	6.58943	0.88229	2.37247
iYMR135W-A	5.97831	-0.218913	2.84445
iYMR013C-1	2.44722	2.49409	2.16087
iYPR013C-0	4.56424	-0.447248	2.15783
iYDR042C	1.37093	1.22933	1.7639
iYJL220W	6.76274	1.52135	2.65553
iYDL185W	2.53915	0.10425	0.815915
iYJL104W	2.21346	-0.0939732	1.69654
iSNR190	2.23914	2.5158	2.01022
iYOR235W	1.44579	-1.64504	1.6488
iYOL121C	2.90188	1.97334	1.54854
iYOR314W	4.62387	-0.0805358	2.55347
iYGL136C	2.7573	2.70049	0.308626
iYGL135W	1.62814	1.59514	1.11374
iYOL157C	6.3983	1.14137	2.79083
iYIL015C-A	1.1216	1.37159	2.0907
iYOR040W	0.798962	0.766994	0.319033
iYEL055C	0.929926	0.921577	0.444449
itT(UGU)G2	1.20825	0.941551	1.39769
iYPR108W	0.197897	1.36393	-0.158416
iYER063W	0.996529	0.277705	0.496177
iYHR193C	0.911729	0.346672	1.10795
itH(GUG)G2	1.29958	0.256294	0.594802
iYPR010C	1.89876	0.628313	1.53621
iYMR319C-0	3.71984	0.134715	0.987224
iYGR221C	0.787046	0.818459	-0.938863
iYPL231W	3.35857	0.24313	0.40976
iYPL131W	0.104164	0.221733	-1.64653
itD(GUC)J2	1.25003	-0.393008	1.04929
iYML071C	0.767184	1.31068	1.68139
iYERCdelta10	1.33059	0.891183	0.888422
iYNL097C	-0.0069135	0.913172	0.0410225
iYER007C-A	0.527085	0.823858	0.201864
iYGL005C	-0.799096	-0.55517	0.215101
itT(UGU)P	0.554198	1.77922	0.290847
YBLCsigma1	0.63869	0.0772334	NA
iYLL028W	1.67685	-1.13849	0.0195515
iSNR54	0.285181	0.157421	1.08931
itD(GUC)B	1.15194	0.354054	0.0263472
iYEL011W	1.23173	1.4993	0.743522
itI(AAU)G	1.36096	-0.939065	1.48369
iSNR6	1.01611	0.237209	-0.323883
iYIL135C	-0.0930649	-0.4664	-0.478379
iYCR063W	2.13374	-1.17932	1.51645
iYLR412W-0	3.97056	-1.4413	1.52177
iYML103C	-0.494007	0.547596	0.267931
iYGL013C	0.0463629	0.529683	0.524594
iYBR230C	0.430552	0.569149	-0.175088
itW(CCA)G1	1.35796	0.353658	0.250168
iYOL026C	1.28481	1.23918	-0.0899284
iYGL235W	-0.326236	-0.0859373	-1.03771
iYHR185C	0.81687	0.656269	-0.252215

## Sheet: Yap6 Bound sites
Intergenic name	Tup1 binding	Mock	Ssn6
iYOR178C-1	6.86898	0.781911	2.81196
iYIR020C	7.3456	0.133819	5.98776
iYJR157W-1	8.08848	0.641109	5.16201
iYJR158W-1	6.91325	-0.425392	4.56125
iYIL100W	7.0327	2.23957	4.04525
iYDR259C	5.68011	-0.308981	3.76575
iYEL041W	5.39752	0.489187	2.4382
iYIL119C-0	9.45183	1.00802	5.85551
iYOL156W-0	5.38497	-0.0104165	2.40031
iYBL030C-1	8.11333	-0.285819	4.21197
iYDR441C	5.11992	0.661279	2.9733
iYOL156W-1	5.43486	-1.45136	2.37047
iYNL289W-0	1.69271	1.64675	0.312698
iYDR076W	6.03835	-0.491858	4.18732
iYEL071W-1	5.01374	0.630276	5.29554
iYDL037C-1	5.12219	-1.46084	4.02004
iYMR016C-1	6.58943	0.88229	2.37247
iYMR135W-A	5.97831	-0.218913	2.84445
iYMR013C-1	2.44722	2.49409	2.16087
iYPR013C-0	4.56424	-0.447248	2.15783
iYDR042C	1.37093	1.22933	1.7639
iYOR049C	4.04415	0.940829	1.25006
iSNR57	2.83634	1.24756	1.44085
iYJL220W	6.76274	1.52135	2.65553
iYKL045W	7.04062	-0.503074	3.32359
iYJL104W	2.21346	-0.0939732	1.69654
iYEL047C	0.649977	-0.966693	0.175776
iYGR248W	6.04994	0.354448	3.55507
iSNR190	2.23914	2.5158	2.01022
iYER158C	3.92786	0.447551	2.55457
iYOR235W	1.44579	-1.64504	1.6488
iYOL121C	2.90188	1.97334	1.54854
iYOR314W	4.62387	-0.0805358	2.55347
iYDL037C-0	5.35053	0.0347091	3.68936
iYNL146W	3.66942	-0.44538	3.24498
iYLR074C	2.41322	-0.544879	1.00005
iYGR249W-0	5.55264	0.172445	4.54829
iYLR105C	0.223325	-1.53549	0.753266
iYKR101W-2	3.81692	1.38384	2.61924
iYNL067W	2.60816	0.49999	1.4607
iYOL157C	6.3983	1.14137	2.79083
iYIL123W	2.57407	-0.452857	1.37483
iYNL179C-1	4.54534	-0.364076	1.74242
iYOR027W	6.28338	-0.930879	2.36842
iYGR249W-1	4.67416	-0.18093	4.25161
iYFL055W-0	3.81735	0.22947	1.59297
iYJR094C-0	4.62324	-0.43483	2.32245
iYER045C-0	4.2298	-0.300418	2.14164
iYOR369C	1.94674	0.745467	1.26822
iYOR178C-0	2.94258	1.03638	1.62602
iYLR412W-1	4.11087	-1.24854	2.56748
iYLR121C	2.07972	-0.56586	-1.55966
iYOR181W	0.834403	1.28308	-0.0525615
iYEL008W	4.01283	-0.190971	1.90702
iYIR013C	3.80293	-0.553311	3.39394
iYNR067C	2.23231	-0.676701	1.56373
iYMR319C-0	3.71984	0.134715	0.987224
iYJR145C	2.25862	1.29327	0.781897
iYHR047C-0	-0.21151	-1.45006	-0.278337
iYOR029W-0	4.07358	-0.484758	2.81602
iYJL216C	2.89947	1.92511	1.59081
iYIL119C-1	6.215	-1.18831	3.68166
iYOR179C-1	2.98843	0.50462	1.28945
iYPR064W	2.34096	-1.45226	1.76669
iYML117W-A	-0.0523694	-1.75351	-0.498893
iYKL110C-0	4.2496	-1.7644	1.73419
iYEL045C	1.40725	0.788151	0.297702
iYIR035C	0.289814	0.0983835	0.722802
iYLR295C	1.20999	-1.36212	1.10515
iYIR018W-0	2.51482	0.340767	1.44127
iYLL052C	2.13181	0.30744	1.52683
iYIR021W	-0.312557	-0.0764384	1.77614
iYGR238C	2.40268	-0.0107768	0.326486
iYJL218W	2.52635	-0.9217	1.70536
iYIR038C-1	1.00403	0.42527	1.4217
iYBL030C-0	2.35154	-0.701882	0.640591
iYNL088W	0.98714	-0.9384	0.615234
iYLR080W	1.04354	1.3305	-0.115019
iYFL005W	0.201094	0.0985089	0.255297
iYOL158C	1.61984	-0.58744	0.776664
iYIR018W-2	4.37003	-0.185404	NA
iYOR179C-0	1.84327	-0.167829	0.687446
iYIR020W-B-1	1.28267	0.965668	NA
iYOR180C	0.509082	0.294351	0.925415
iYIR022W	-0.150457	1.28776	1.16099

## Sheet: Sut1 Bound sites
Intergenic name	Tup1 binding	Mock	Ssn6
iYOR178C-1	6.86898	0.781911	2.81196
iYIR020C	7.3456	0.133819	5.98776
iYJR157W-1	8.08848	0.641109	5.16201
iYIL100W	7.0327	2.23957	4.04525
iYIL119C-0	9.45183	1.00802	5.85551
iYBL030C-1	8.11333	-0.285819	4.21197
iYDR441C	5.11992	0.661279	2.9733
iYBL044W	2.18072	-1.14644	NA
iYDR076W	6.03835	-0.491858	4.18732
iYDL037C-1	5.12219	-1.46084	4.02004
iYGL001C	0.334196	-0.849718	-0.903109
iYMR135W-A	5.97831	-0.218913	2.84445
iYGR271W	0.520215	1.64905	0.783673
iYOR049C	4.04415	0.940829	1.25006
iYGR248W	6.04994	0.354448	3.55507
iYMR069W	2.6485	0.00787934	2.68821
iYAL064C-A-5	4.19181	-0.230802	2.71814
iYMR056C	1.71023	-0.819451	2.87462
iYEL069C-0	4.4029	0.610027	4.52401
iYDR343C	5.31497	-0.0854574	2.97406
iYKL063C-1	4.47696	-1.21608	1.09703
iYNL179C-1	4.54534	-0.364076	1.74242
iYDR134C	4.64036	-0.798557	2.77365
itL(CAA)G1	2.76661	0.189553	1.59354
iYOR134W	0.717189	0.200872	-0.891386
iYFL055W-0	3.81735	0.22947	1.59297
iYPL177C-0	2.60773	-1.36898	2.05792
iYDL214C	2.99099	-0.214734	2.51568
iYER045C-0	4.2298	-0.300418	2.14164
iYLR304C	2.65576	-1.06039	1.56099
iYJL106W-1	4.88288	-1.43448	2.3131
iYKL110C-1	5.37346	-0.344457	3.53017
iYGR067C	2.31206	1.22793	NA
itT(AGU)J	1.47329	0.72703	1.72717
iYPL231W	3.35857	0.24313	0.40976
iYLR153C	0.192671	-2.89975	0.777919
iYKL097W-A-1	3.64016	-1.21002	1.49264
iYER044C	1.58411	-2.08375	0.741792
iYMR016C-0	5.98959	-0.151985	3.04661
iYER145C	2.2822	-0.601033	0.953449
iYNL231C	0.268406	0.131371	-0.793415
iYJL106W-0	4.0574	1.13757	2.82736
iYMR010W-1	2.83306	-1.34856	2.25358
iYPL063W	1.72661	-0.845308	0.189943
iYHL028W	1.90159	-1.87516	1.59522
iYKR075C-0	2.22708	-0.894216	1.02093
iYML117W-A	-0.0523694	-1.75351	-0.498893
iYIL013C	4.00426	-0.185308	2.49885
iYKL072W	-0.368819	0.0458727	-0.287757
iYGL056C	0.566523	-0.415905	-0.340359
iYOR106W	1.80689	0.00311065	0.341452
iYHR094C	0.102914	-3.2648	NA
iYKR096W	2.74368	0.202222	0.987632
iYPL026C	1.75258	-1.82669	-1.10696
iYNL039W	-0.587092	0.461174	-0.253263
iYPR006C	0.0503576	0.937385	0.882459
iYMR037C	0.700251	0.883665	-0.446401
iYHR080C	-0.337997	-0.607354	0.0327092
iYBR069C	0.774254	-0.570865	1.45245
iYPL156C	-0.160479	0.591655	-1.17413
iYGR170W	-0.324117	0.284945	-0.191712
iYLL034C	-0.572532	0.84716	1.12454
iYGL163C-1	0.750623	-0.771461	-0.676114
iYOL159C	0.708607	-0.22827	0.310916
iYAL063C-0	4.70338	0.246194	3.11083

## Sheet: Sko1 Bound sites
Intergenic name	Tup1 binding	Mock	Ssn6
iYBL030C-1	8.11333	-0.285819	4.21197
iYDR076W	6.03835	-0.491858	4.18732
iYMR016C-1	6.58943	0.88229	2.37247
iYPR013C-0	4.56424	-0.447248	2.15783
iYKL162C-A-1	3.79893	-1.02783	2.60826
iYMR069W	2.6485	0.00787934	2.68821
iYHR032W	5.55166	1.14714	2.39267
iYOR316C-1	3.12422	-0.786959	1.48018
iYHL042W	3.60905	-1.15189	1.35996
iYDR535C	3.19551	-0.00622639	3.11396
iYHR048W	2.12961	0.168434	0.785253
iYKL097W-A-1	3.64016	-1.21002	1.49264
iYOR318C	1.12146	-0.161634	-0.414956
iYHR096C	0.291519	NA	NA
iYGL007W-0	4.19121	-0.224264	2.40887
iYFL021W-0	1.003	0.0310465	0.980305
iYMR172C-A	0.908784	0.637605	2.08861

## Sheet: Skn7 Bound sites
Intergenic name	Tup1 binding	Mock	Ssn6
iYIL100W	7.0327	2.23957	4.04525
iYBL030C-1	8.11333	-0.285819	4.21197
iYMR016C-1	6.58943	0.88229	2.37247
iYMR135W-A	5.97831	-0.218913	2.84445
iYGR248W	6.04994	0.354448	3.55507
iSNR190	2.23914	2.5158	2.01022
iYOR314W	4.62387	-0.0805358	2.55347
iYKL063C-1	4.47696	-1.21608	1.09703
iYGR249W-1	4.67416	-0.18093	4.25161
iCEN4	0.256588	-1.79044	-1.13062
iYGR279C	2.93335	0.557799	1.57913
iYKL097C	3.52717	-1.04855	2.26377
iYJL106W-1	4.88288	-1.43448	2.3131
iYMR165C	-0.513749	1.2528	-0.924705
iYMR016C-0	5.98959	-0.151985	3.04661
iYBR157C-0	2.81001	-1.2607	0.530182
iYKR041W	5.63298	-0.0675922	3.15867
iYJL106W-0	4.0574	1.13757	2.82736
iYMR305C	2.10993	0.166619	-2.74469
iYLR110C	3.12486	0.76538	2.51191
iYML089C	1.99867	-0.214642	1.26196
iYER010C-1	2.85917	-0.607802	2.59653
itG(GCC)P2	0.0648033	1.71303	0.977443
iYGL056C	0.566523	-0.415905	-0.340359
iYEL045C	1.40725	0.788151	0.297702
iYPL025C	2.5145	-0.670876	1.25614
iYJL116C	1.0884	-0.129747	0.443701
iYIR018W-0	2.51482	0.340767	1.44127
iYJL113W	-0.681531	0.937463	0.861647
iYOL053C-A	2.37372	-0.617774	2.76993
iYKR096W	2.74368	0.202222	0.987632
iYDR043C-0	2.02994	-0.274039	1.79803
iYDR525W	2.03852	-1.96617	2.36352
iYCR073C	-0.148504	0.157281	-3.09534
iYML008C	0.561356	-0.154915	0.908599
iYDR309C	2.15661	-0.571411	2.31601
iYJL158C	2.94085	-1.53396	1.85545
iYLL019C	-0.168914	-0.0867136	-0.147459
itA(AGC)P	0.0977437	0.777566	-1.13236
iYPR161C	1.07766	2.08843	0.699626
iYDR155C	-0.145832	0.696902	0.383154
iYML053C	0.338526	-0.243296	-0.146862
iYLL018C-A	-0.226796	0.589914	0.124641
iYMR172C-A	0.908784	0.637605	2.08861
iYLRWdelta15	0.0764136	-0.876207	-0.40794
iYLR108C	0.474065	0.43123	0.53629
iYJL159W	1.02274	0.414652	0.348932

## Sheet: Phd1 Bound sites
Intergenic name	Tup1 binding	Mock	Ssn6
iYIR020C	7.3456	0.133819	5.98776
iYJR157W-1	8.08848	0.641109	5.16201
iYJR158W-1	6.91325	-0.425392	4.56125
iYIL100W	7.0327	2.23957	4.04525
iYEL041W	5.39752	0.489187	2.4382
iYBL030C-1	8.11333	-0.285819	4.21197
iYOL156W-1	5.43486	-1.45136	2.37047
iYEL071W-1	5.01374	0.630276	5.29554
iYMR016C-1	6.58943	0.88229	2.37247
iYMR135W-A	5.97831	-0.218913	2.84445
iYPR013C-0	4.56424	-0.447248	2.15783
iYJL220W	6.76274	1.52135	2.65553
iYKL162C-A-1	3.79893	-1.02783	2.60826
iYAL064C-A-5	4.19181	-0.230802	2.71814
iYEL069C-0	4.4029	0.610027	4.52401
iYDR343C	5.31497	-0.0854574	2.97406
iYKR101W-2	3.81692	1.38384	2.61924
iYPR013C-1	4.63883	-0.155192	3.70153
iYKL063C-1	4.47696	-1.21608	1.09703
iYNL179C-1	4.54534	-0.364076	1.74242
iYOR027W	6.28338	-0.930879	2.36842
iYPL177C-0	2.60773	-1.36898	2.05792
iYGR279C	2.93335	0.557799	1.57913
iYER002W	0.18161	-0.500005	1.0189
iYJR094C-0	4.62324	-0.43483	2.32245
iYER045C-0	4.2298	-0.300418	2.14164
iYJL106W-1	4.88288	-1.43448	2.3131
iYPR014C-1	1.16095	-0.22641	-0.0564908
iYKL110C-1	5.37346	-0.344457	3.53017
iYOR181W	0.834403	1.28308	-0.0525615
iYEL008W	4.01283	-0.190971	1.90702
iYAR044W-1	3.55015	-0.0373454	2.59865
iYDR451C	1.48375	-0.951987	0.304477
iYOR029W-0	4.07358	-0.484758	2.81602
iYMR016C-0	5.98959	-0.151985	3.04661
iYER145C	2.2822	-0.601033	0.953449
iYGL097W-0	5.55051	-0.711655	1.26646
iYJR128W	1.70025	-0.344744	-0.129932
iYMR015C	2.63249	0.0395068	0.830455
iYKL061W	0.187164	-1.17706	-1.11972
iYBR157C-1	2.64291	-1.40688	0.197771
iYOR179C-1	2.98843	0.50462	1.28945
iYDL036C	-0.13022	-0.590206	1.35121
iYER033C	3.33471	-0.6539	3.64724
iYIL013C	4.00426	-0.185308	2.49885
iYOR106W	1.80689	0.00311065	0.341452
iYCR063W	2.13374	-1.17932	1.51645
iYMR018W	0.0930066	-0.441057	-0.854994
iYMR137C	-0.77005	-0.640655	-0.864453
iYPL266W	1.47301	-1.16623	1.81137
iYMR017W	0.994504	-0.373618	0.412448
YPRWdelta14	0.292117	0.796065	-2.34345
iYKR074W	0.185052	-0.200859	0.205961
iYDR525W	2.03852	-1.96617	2.36352
Q0185A	-1.57153	-3.26271	-4.65438
Q0185A	-1.57153	-3.26271	-4.65438
iYNL336W-0	0.869444	-0.762624	0.692546
Q0183B	-3.31373	-7.70786	-6.76346
Q0183B	-3.31373	-7.70786	-6.76346
iYBL030C-0	2.35154	-0.701882	0.640591
iYGR250C-1	-0.0936279	-1.00221	0.209481
iYML115C	-1.26136	-2.01598	0.98946
TEL15R-4	0.11958	-0.450756	-0.392383
iYEL039C	0.137613	-1.51485	1.33052
iYIL011W	-0.346141	0.824438	-0.227139
iYBL029W	1.52299	-0.861557	0.297525
iYEL068C	0.806274	-0.156999	0.641992
iYBL108W	1.10332	0.0932367	-0.635285
iYHR005C	0.847648	-1.1261	1.37437
iYML132W-1	0.461324	-0.796159	2.11316
iYMR019W	-0.244032	-0.59149	0.614503
iYMR020W	0.103368	0.618713	1.23105
iYDR261C-0	0.235298	-0.39667	0.76065
iYAR047C-1	4.83329	0.353442	1.82985
iYAL063C-0	4.70338	0.246194	3.11083
iYNL335W	1.20728	2.12727	0.868514

## Sheet: Mig1 Bound sites
Intergenic name	Tup1 binding	Mock	Ssn6
iYOR178C-1	6.86898	0.781911	2.81196
iYJR158W-1	6.91325	-0.425392	4.56125
iYDR441C	5.11992	0.661279	2.9733
iYEL071W-1	5.01374	0.630276	5.29554
iYJL220W	6.76274	1.52135	2.65553
iYEL069C-0	4.4029	0.610027	4.52401
iYOL157C	6.3983	1.14137	2.79083
iYFL055W-0	3.81735	0.22947	1.59297
iYDR464W	-0.754145	0.129542	0.295156
iYEL071W-0	4.54785	-0.00520038	3.4363
iYJL216C	2.89947	1.92511	1.59081
iYPR183W	0.746337	1.36338	0.946047
iYJR158W-0	2.95142	0.728353	1.21048
iYMR163C	0.659617	1.31178	1.5225
iYCR073C	-0.148504	0.157281	-3.09534
iYLR424W	1.15053	1.15842	-0.232003
iYMR260C	-0.183003	-1.0425	-1.0119
iYDL150W	-1.37493	0.274525	-0.685485
iYHR062C	-0.707507	-0.534314	-1.74303
iYLR240W	-1.07861	-0.925076	-2.32098

## Sheet: Mcm1 Bound sites
Intergenic name	Tup1 binding	Mock	Ssn6
iYEL041W	5.39752	0.489187	2.4382
iYOR314W	4.62387	-0.0805358	2.55347
iYNL146W	3.66942	-0.44538	3.24498
iYLR369W	-0.0934955	0.135519	-0.257095
iCEN13	0.0698582	0.0335414	0.87786
itT(AGU)J	1.47329	0.72703	1.72717
iYDR451C	1.48375	-0.951987	0.304477
iYER044C	1.58411	-2.08375	0.741792
itT(AGU)N2	0.489163	1.10485	1.32342
iYNR062C-0	-0.0623786	0.431163	-0.0513261
iYHR151C	0.346493	NA	0.0465826
iYPRWsigma2-1	0.511793	1.02834	1.28957
iYER074W	0.541749	0.169583	0.0754687
iYDL044C	-0.41059	-0.0527513	-2.14234
iYJLWdelta9	-0.503335	0.0636734	0.314026
itE(CUC)D-0	1.74903	0.748283	2.04493
iYGL032C	1.16355	0.0565496	-0.8398
iYAR003W	-0.912713	-0.488647	-0.340287
iYLR303W	3.38245	-0.581644	0.501207
iYLR189C	-0.361098	-0.376775	-1.17896
iYBR044C	0.162643	0.509311	1.1028
iYDR460W	0.0990224	-1.51487	-0.999824
iYEL045C	1.40725	0.788151	0.297702
itK(UUU)G1	0.204566	0.510125	0.575364
iYIL016W	0.69608	-1.64658	-0.210879
iYBL060W	-0.254834	-0.469864	0.224725
iYAL040C	2.89467	1.08416	0.13979
iYER111C	1.28127	-0.984111	2.10107
iYGL117W	0.0194181	1.24456	0.926651
iYJR091C	-0.146126	-0.11215	-0.558767
iYGL201C	0.201357	0.722736	0.742493
iYPL043W	-0.950584	0.622913	0.334104
iYIL077C	-0.141686	0.0515118	-0.193714
itW(CCA)G1	1.35796	0.353658	0.250168
iYLR084C	0.294788	0.0321742	-2.25175
iYIL069C	1.04628	0.14898	-0.108165
iYPR112C	-1.59906	-0.460746	-0.552797
iYDR146C	-0.0823891	-0.805548	0.627144
iYDR179C	0.0318978	1.11473	1.14813
iYOR388C	0.994438	-0.49517	-0.631781
iYNR027W	0.863004	-0.920777	0.736118
iYKL059C	-0.0127688	-0.646681	0.616601
iYGR168C	-0.461943	-1.38509	0.299078
iYML053C	0.338526	-0.243296	-0.146862
iYNR062C-1	-1.07649	0.490095	-0.970551
iYNL299W	-0.0473271	-0.990335	-1.90824
iYJL160C-1	1.26431	-0.955572	0.636207
iYIL124W	0.505179	-0.61325	0.0311314
iYPL277C	1.30718	-0.478744	0.441143
iYLR273C	1.05151	-0.423516	0.138844
iYHR098C	1.2043	-3.36574	-0.35872
iYLR131C	0.358603	0.334639	0.558697
iYJL052W	0.285455	0.317055	0.297163
iYNL054W	-0.422357	-1.3544	-0.780484
iYDR148C	-0.845037	-0.629493	-1.1404
iYIL159W	0.903812	0.633305	-0.521544
iYGR047C	-0.762268	-0.553317	-0.2851
iYAR018C	-0.0208058	-0.458007	NA
iYDR527W-1	0.782834	-0.433006	0.0884315
iYBL027W	0.713929	-0.269396	0.135777
iYAL039C-1	2.48295	-0.0475814	1.7525

## Sheet: Nrg1 Bound sites
Intergenic name	Tup1 binding	Mock	Ssn6
iYOR178C-1	6.86898	0.781911	2.81196
iYIR020C	7.3456	0.133819	5.98776
iYJR157W-1	8.08848	0.641109	5.16201
iYJR158W-1	6.91325	-0.425392	4.56125
iYIL100W	7.0327	2.23957	4.04525
iYDR259C	5.68011	-0.308981	3.76575
iYEL041W	5.39752	0.489187	2.4382
iYIL119C-0	9.45183	1.00802	5.85551
iYOL156W-0	5.38497	-0.0104165	2.40031
iYBL030C-1	8.11333	-0.285819	4.21197
iYDR441C	5.11992	0.661279	2.9733
iYOL156W-1	5.43486	-1.45136	2.37047
iYEL071W-1	5.01374	0.630276	5.29554
iYMR016C-1	6.58943	0.88229	2.37247
iYPR013C-0	4.56424	-0.447248	2.15783
iYDR042C	1.37093	1.22933	1.7639
iYOR049C	4.04415	0.940829	1.25006
iYJL220W	6.76274	1.52135	2.65553
iYKL045W	7.04062	-0.503074	3.32359
iYGR248W	6.04994	0.354448	3.55507
iYKL162C-A-1	3.79893	-1.02783	2.60826
iYAL064C-A-5	4.19181	-0.230802	2.71814
iYHR032W	5.55166	1.14714	2.39267
iYOR314W	4.62387	-0.0805358	2.55347
iYEL069C-0	4.4029	0.610027	4.52401
iYGR249W-0	5.55264	0.172445	4.54829
iYKR101W-2	3.81692	1.38384	2.61924
iYOL157C	6.3983	1.14137	2.79083
iYPR013C-1	4.63883	-0.155192	3.70153
iYDR134C	4.64036	-0.798557	2.77365
iYHL042W	3.60905	-1.15189	1.35996
iYFL055W-0	3.81735	0.22947	1.59297
iCEN5	2.97533	-0.237125	1.07153
iYDR464W	-0.754145	0.129542	0.295156
iYJR094C-0	4.62324	-0.43483	2.32245
iYER045C-0	4.2298	-0.300418	2.14164
iYIR013C	3.80293	-0.553311	3.39394
iYMR319C-0	3.71984	0.134715	0.987224
iYDR535C	3.19551	-0.00622639	3.11396
iYPL231W	3.35857	0.24313	0.40976
iYOR029W-0	4.07358	-0.484758	2.81602
Q0005	0.195285	-0.453885	-1.00805
iYJR157W-0	6.37325	0.656514	3.64185
iYNL111C	0.0819392	1.42967	1.51752
iYJL216C	2.89947	1.92511	1.59081
iYIL119C-1	6.215	-1.18831	3.68166
iYOR179C-1	2.98843	0.50462	1.28945
iYER010C-1	2.85917	-0.607802	2.59653
iYNR059W	2.88487	-0.498626	0.78519
iYARCdelta8-0	3.53756	-0.490639	1.68527
iYOR138C	-0.675927	-0.742376	-0.435016
iYIR012W	0.331554	2.52241	1.78449
iYDR043C-0	2.02994	-0.274039	1.79803
iYIL098C	-0.220098	0.18499	1.45831
iYAL022C	-1.64799	0.220741	-2.25566
iYDR433W	0.575978	0.723333	0.32964
iYIL020C	0.128639	0.750643	1.49847
iYNR069C-1	-0.203433	2.40043	0.911486
iYIL003W	1.62064	2.35092	0.748259
iYFR017C	0.811368	0.340125	-0.146579
iYJL148W	0.158046	-0.995253	0.455217
iYPL253C	-1.62227	1.01837	-0.76631
iYOR273C	0.466139	-1.06953	-0.0683542
iYLR012C	0.560739	1.35386	NA
iYLR210W	0.752751	0.675175	0.209311
iYAL018C	-1.37196	-2.62482	0.939644
iYJR144W	0.694772	2.72432	0.786377
iYPL036W	-1.10979	1.28295	0.222198
iYHR138C	-0.44559	5.13474	NA

## Sheet: Cin5 Bound sites
Intergenic name	Tup1 binding	Mock	Ssn6
iYOR178C-1	6.86898	0.781911	2.81196
iYIR020C	7.3456	0.133819	5.98776
iYJR157W-1	8.08848	0.641109	5.16201
iYDR259C	5.68011	-0.308981	3.76575
iYIL119C-0	9.45183	1.00802	5.85551
iYOL156W-0	5.38497	-0.0104165	2.40031
iYBL030C-1	8.11333	-0.285819	4.21197
iYDR441C	5.11992	0.661279	2.9733
iYOL156W-1	5.43486	-1.45136	2.37047
iYBL044W	2.18072	-1.14644	NA
iYDR076W	6.03835	-0.491858	4.18732
iYDL037C-1	5.12219	-1.46084	4.02004
iYPR013C-0	4.56424	-0.447248	2.15783
iYDR042C	1.37093	1.22933	1.7639
iYOR049C	4.04415	0.940829	1.25006
iYJL220W	6.76274	1.52135	2.65553
iYKL045W	7.04062	-0.503074	3.32359
iYJL104W	2.21346	-0.0939732	1.69654
iYGR248W	6.04994	0.354448	3.55507
iYDL130W	1.50927	0.300028	0.210458
iYOR314W	4.62387	-0.0805358	2.55347
iYDL037C-0	5.35053	0.0347091	3.68936
iYNL146W	3.66942	-0.44538	3.24498
iYLR074C	2.41322	-0.544879	1.00005
iYGR249W-0	5.55264	0.172445	4.54829
iYDR343C	5.31497	-0.0854574	2.97406
iYKR101W-2	3.81692	1.38384	2.61924
iYOL157C	6.3983	1.14137	2.79083
iYPR013C-1	4.63883	-0.155192	3.70153
iYNL179C-1	4.54534	-0.364076	1.74242
iYOR316C-1	3.12422	-0.786959	1.48018
iYGR171C	-0.625285	-1.03041	-0.153701
iYOR027W	6.28338	-0.930879	2.36842
iYHL042W	3.60905	-1.15189	1.35996
iYDR033W	0.999888	-0.652718	-0.875772
iYLR044C	2.29491	-0.802839	0.1444
iYOR311C	0.64217	0.642423	1.07687
iYJR094C-0	4.62324	-0.43483	2.32245
iYER045C-0	4.2298	-0.300418	2.14164
iYOR178C-0	2.94258	1.03638	1.62602
iYLR304C	2.65576	-1.06039	1.56099
iYLR412W-1	4.11087	-1.24854	2.56748
iYLR121C	2.07972	-0.56586	-1.55966
iYMR319C-0	3.71984	0.134715	0.987224
iYKL103C	-0.293141	0.972304	0.670882
iYJR145C	2.25862	1.29327	0.781897
iYHR047C-0	-0.21151	-1.45006	-0.278337
iYHR048W	2.12961	0.168434	0.785253
iYLR001C	-0.889893	1.1115	-1.1103
iYGR035C	2.77961	1.37049	0.802987
iYLR228C-0	1.7382	-0.139933	1.01914
iYBR157C-0	2.81001	-1.2607	0.530182
iYIL119C-1	6.215	-1.18831	3.68166
iYPR183W	0.746337	1.36338	0.946047
iYPL063W	1.72661	-0.845308	0.189943
iYJR102C	0.0213184	-0.317275	0.537688
iYLR264W	2.68457	0.73676	1.80147
iYPR064W	2.34096	-1.45226	1.76669
iYJL077C	0.8773	-1.16741	1.71562
iYML117W-A	-0.0523694	-1.75351	-0.498893
iYER072W	1.59284	-0.967841	0.369527
iYKL110C-0	4.2496	-1.7644	1.73419
iYMR176W	-0.403804	0.276481	-0.429105
iYBR070C	-0.0481034	-1.88546	-0.610927
iYEL045C	1.40725	0.788151	0.297702
iYOL060C	2.15055	1.0336	0.283458
iYKL183W	2.14567	0.84383	0.000203049
iYLR412W-0	3.97056	-1.4413	1.52177
iYPR034W	0.670546	0.460232	-0.659687
iYKL143W	0.224999	-0.585268	1.61483
iYBR076W	1.04897	1.00819	0.877775
iYOL053C-A	2.37372	-0.617774	2.76993
iYBR008C	0.190003	-0.455468	-0.520519
iYOL117W	-0.196829	-0.693066	-0.0725269
iYKL108W	0.0909287	-0.914085	-0.0491681
iYLL052C	2.13181	0.30744	1.52683
iYHR127W	0.24162	NA	NA
iYGR180C	3.1919	0.447922	0.686717
iYAL038W	0.0122575	-0.869532	-0.183073
iYPL165C	0.399989	0.579347	0.523952
iYGR192C	2.23704	0.232299	0.814924
iYPL062W	1.91211	-0.9183	0.290825
iYOR344C-1	3.47084	-0.284526	0.438174
iYDL003W	-0.247385	0.212993	0.761796
iYBR007C-0	0.421769	-0.570996	0.0826762
iYBR007C-0	0.421769	-0.570996	0.0826762
iYLR330W	0.434488	-0.557997	-0.24167
iYOR047C	0.590511	-1.61477	-0.75583
iYGR238C	2.40268	-0.0107768	0.326486
iYKL131W	-0.299491	-1.00925	-0.576425
iYKL131W	-0.299491	-1.00925	-0.576425
iYJL031C	-0.203529	0.979958	0.909111
iYOR380W-0	1.33367	0.189168	0.597178
iYOL110W	4.4527	1.4006	2.39078
iYER038C	-0.320674	-2.92146	-0.616957
iYDR345C-0	2.0786	-0.841381	0.816729
iYMR082C-0	2.95816	1.22937	2.06035
iYJR131W	-0.262099	-0.773711	2.16975
iYGL007W-0	4.19121	-0.224264	2.40887
iYOR301W	1.66159	-0.664069	-1.49858
itG(UCC)G	0.815081	2.23232	1.78875
iYBL030C-0	2.35154	-0.701882	0.640591
iYCL025C	2.69445	0.335358	1.53111
iYGR178C	-1.44616	-1.72113	-0.239908
iYLR362W	0.3891	0.64015	NA
iYPR014C-0	2.43275	-0.465569	1.98572
iYOR229W	0.894239	-0.640487	0.0263426
iYBR053C-1	0.472629	-1.51552	-0.467864
iYDR300C	1.50357	1.19101	0.0182324
iYNL088W	0.98714	-0.9384	0.615234
iYJR060W	0.388099	0.251785	0.868326
iYMR245W	0.649445	-1.49326	-1.76151
itA(AGC)P	0.0977437	0.777566	-1.13236
iYLR080W	1.04354	1.3305	-0.115019
iYOR018W	-0.189847	1.7084	1.68425
iYDL169C	0.248219	0.603254	-0.76412
iYIR001C	-0.404767	-0.4584	-0.432006
iYFL005W	0.201094	0.0985089	0.255297
iYOR380W-1	1.13756	-0.561549	-0.0221773
iYMR283C	-0.812198	-1.15195	-1.48427
iYJL171C	-0.803044	-1.14821	-2.25619
iYER028C	1.39177	-0.580101	-0.813879
iYJR003C	-0.348558	-1.13546	0.954678
iYML132W-1	0.461324	-0.796159	2.11316
itG(GCC)F2	0.90862	3.42104	1.89129
iYOR306C	0.357334	-0.289778	-1.44251
iYEL053C	0.214409	1.71937	0.599703
iYLL062C	-0.336731	0.321641	-0.386411
iYLL007C	-0.61323	-0.382559	-0.795855
iYGR133W	0.11657	-0.0829292	-2.64992
iYKR066C	-0.196462	-0.160843	-0.383636
iYDR505C	-0.653246	-0.850534	-1.80226
iYEL012W	-0.087528	-0.0840042	-0.78159
iYLR034C	0.46474	-0.040594	0.0895942
iYLL054C	-0.215394	0.444303	0.480734
iYDR338C	0.648501	1.36671	0.855109

[truncated: 5 more sheets: Cup9 Bound Sites, RFX1 bound sites, AFT1 (Rcs1) bound sites, Sheet2, Sheet3]
